# Supplementary material for: Phylogeographic reconstruction using air transportation data and its application to the 2009 H1N1 influenza A pandemic
Source: PubMed Central journal article supplement (PMC7032730; doi:10.1371/journal.pcbi.1007101), 2020-02-07
Supplement: pcbi.1007101.s005.pdf [file pcbi.1007101.s005.pdf]

| Airport | Number of transitions | Number of sequences | N-th largest airport in North America |
|---------|-----------------------|---------------------|---------------------------------------|
| JFK     | 31                    | 104                 | 5                                     |
| PHX     | 24                    | 7                   | 10                                    |
| LAX     | 21                    | 29                  | 3                                     |
| IAH     | 13                    | 1                   | 11                                    |
| MEX     | 11                    | 42                  | 15                                    |
| PHL     | 11                    | 4                   | 20                                    |

**S1 Table: Main airports involved in the spread of pH1N1.**
